# Supplementary material for: A New Assessment of Robust Capuchin Monkey (Sapajus) Evolutionary History Using Genome-Wide SNP Marker Data and a Bayesian Approach to Species Delimitation
Source: MDPI journal article supplement (doi:10.3390/genes14050970), 2023-04-25
Supplement: s1 [file s1]

**Table S3** – Total number of loci recovered for each sample that are present in the final data matrix under varying levels of missing data.

| Total number of loci recovered for each sample by % of missing data |                     |                                   |                                   |                                   |                                  |                                  |                                  |                                 |
|---------------------------------------------------------------------|---------------------|-----------------------------------|-----------------------------------|-----------------------------------|----------------------------------|----------------------------------|----------------------------------|---------------------------------|
| Sample code                                                         | Species             | ≈20%<br>(150 minsp <sup>1</sup> ) | ≈25%<br>(130 minsp <sup>1</sup> ) | ≈30%<br>(100 minsp <sup>1</sup> ) | ≈40%<br>(50 minsp <sup>1</sup> ) | ≈50%<br>(30 minsp <sup>1</sup> ) | ≈60%<br>(10 minsp <sup>1</sup> ) | ≈70%<br>(4 minsp <sup>1</sup> ) |
| FR85                                                                | <i>C. albifrons</i> | 16115                             | 24473                             | 28923                             | 32839                            | 34610                            | 39286                            | 40167                           |
| IPB994                                                              | <i>C. albifrons</i> | 13188                             | 18490                             | 21092                             | 23256                            | 24131                            | 26953                            | 27280                           |
| LB1272                                                              | <i>C. albifrons</i> | 16362                             | 26474                             | 33099                             | 39178                            | 42225                            | 48973                            | 50377                           |
| LB1285                                                              | <i>C. albifrons</i> | 16689                             | 28150                             | 37502                             | 50513                            | 59576                            | 72811                            | 76963                           |
| LB1293                                                              | <i>C. albifrons</i> | 16668                             | 27694                             | 35683                             | 44645                            | 50236                            | 59166                            | 61412                           |
| LB1297                                                              | <i>C. albifrons</i> | 16627                             | 27282                             | 34546                             | 42764                            | 47219                            | 55000                            | 56962                           |
| LB736                                                               | <i>C. albifrons</i> | 16639                             | 27906                             | 36938                             | 48718                            | 55894                            | 66530                            | 69762                           |
| LB772                                                               | <i>C. albifrons</i> | 16628                             | 27738                             | 36289                             | 45570                            | 52205                            | 63327                            | 66190                           |
| LB858                                                               | <i>C. albifrons</i> | 16492                             | 26881                             | 33635                             | 38652                            | 40387                            | 45804                            | 46755                           |
| RETA10                                                              | <i>C. albifrons</i> | 15764                             | 23584                             | 27466                             | 30879                            | 32318                            | 36649                            | 37425                           |
| RETA9                                                               | <i>C. albifrons</i> | 8866                              | 11599                             | 13067                             | 14868                            | 15903                            | 18326                            | 19124                           |
| CPB414                                                              | <i>C. kaapori</i>   | 7848                              | 11008                             | 12365                             | 13410                            | 13881                            | 15649                            | 15921                           |
| CPB443                                                              | <i>C. kaapori</i>   | 16592                             | 27688                             | 36280                             | 46497                            | 53791                            | 64978                            | 68042                           |
| AP116                                                               | <i>C. olivaceus</i> | 16620                             | 27586                             | 35730                             | 44381                            | 49144                            | 57839                            | 60156                           |
| AP117                                                               | <i>C. olivaceus</i> | 16195                             | 25622                             | 31699                             | 38230                            | 41604                            | 48101                            | 49709                           |
| AP178                                                               | <i>C. olivaceus</i> | 16356                             | 26391                             | 32757                             | 37582                            | 39343                            | 44658                            | 45724                           |
| AP241                                                               | <i>C. olivaceus</i> | 15924                             | 24259                             | 28643                             | 32119                            | 33452                            | 37591                            | 38335                           |
| AP242                                                               | <i>C. olivaceus</i> | 16592                             | 27562                             | 35566                             | 43549                            | 48078                            | 56725                            | 59032                           |
| CPB479                                                              | <i>C. olivaceus</i> | 13231                             | 19279                             | 23219                             | 28457                            | 32234                            | 38927                            | 42649                           |
| AP110                                                               | <i>S. apella</i>    | 16109                             | 27209                             | 33125                             | 37191                            | 38248                            | 38772                            | 38848                           |
| AP133                                                               | <i>S. apella</i>    | 16529                             | 28760                             | 36169                             | 41579                            | 43428                            | 44520                            | 44647                           |
| AP146                                                               | <i>S. apella</i>    | 16083                             | 26301                             | 31352                             | 35086                            | 36687                            | 37638                            | 37781                           |
| AP162                                                               | <i>S. apella</i>    | 16749                             | 30013                             | 38883                             | 45923                            | 48827                            | 50932                            | 51208                           |
| AP225                                                               | <i>S. apella</i>    | 14090                             | 23533                             | 28734                             | 32007                            | 33100                            | 33973                            | 34127                           |
| AP226                                                               | <i>S. apella</i>    | 9926                              | 14122                             | 15636                             | 16422                            | 16639                            | 16824                            | 16850                           |
| CA2403                                                              | <i>S. apella</i>    | 16225                             | 28677                             | 36848                             | 43434                            | 46376                            | 49168                            | 49733                           |
| CN138                                                               | <i>S. apella</i>    | 16828                             | 30676                             | 41148                             | 51643                            | 55500                            | 57778                            | 58088                           |
| CN150                                                               | <i>S. apella</i>    | 16497                             | 28710                             | 35590                             | 39285                            | 40131                            | 40666                            | 40732                           |
| CN153                                                               | <i>S. apella</i>    | 16474                             | 29290                             | 38078                             | 45848                            | 48735                            | 50526                            | 50895                           |
| CN217                                                               | <i>S. apella</i>    | 11320                             | 18057                             | 21209                             | 22911                            | 23332                            | 23698                            | 23796                           |
| CN235                                                               | <i>S. apella</i>    | 16080                             | 27752                             | 35127                             | 41725                            | 45127                            | 48033                            | 48508                           |
| CN236                                                               | <i>S. apella</i>    | 7268                              | 11005                             | 12807                             | 14096                            | 14638                            | 15025                            | 15116                           |
| CN249                                                               | <i>S. apella</i>    | 16844                             | 30557                             | 40517                             | 50439                            | 56098                            | 61045                            | 61837                           |
| CN250                                                               | <i>S. apella</i>    | 16788                             | 30305                             | 39113                             | 44526                            | 45857                            | 46719                            | 46835                           |
| CN292                                                               | <i>S. apella</i>    | 16870                             | 31116                             | 42934                             | 55882                            | 61522                            | 65866                            | 66787                           |
| CN293                                                               | <i>S. apella</i>    | 16860                             | 30974                             | 41701                             | 50416                            | 53333                            | 55440                            | 55670                           |
| CTG19                                                               | <i>S. apella</i>    | 16840                             | 30732                             | 40993                             | 49557                            | 54150                            | 58651                            | 59236                           |
| CTG30                                                               | <i>S. apella</i>    | 16828                             | 30575                             | 40347                             | 49276                            | 53350                            | 56338                            | 56888                           |
| FES08                                                               | <i>S. apella</i>    | 16858                             | 31126                             | 43379                             | 60519                            | 76757                            | 98495                            | 102571                          |
| JIR4590                                                             | <i>S. apella</i>    | 16869                             | 31126                             | 43241                             | 58467                            | 66077                            | 72244                            | 73087                           |
| LB807                                                               | <i>S. apella</i>    | 16552                             | 29593                             | 38828                             | 47432                            | 52767                            | 57950                            | 58936                           |
| LB808                                                               | <i>S. apella</i>    | 16869                             | 31115                             | 43000                             | 57740                            | 65985                            | 73316                            | 74495                           |
| LB859                                                               | <i>S. apella</i>    | 16498                             | 28916                             | 36667                             | 41857                            | 43502                            | 44655                            | 44807                           |
| LB860                                                               | <i>S. apella</i>    | 16869                             | 31002                             | 42002                             | 52962                            | 59258                            | 64905                            | 65669                           |
| MCB42                                                               | <i>S. apella</i>    | 16678                             | 29610                             | 37752                             | 43047                            | 44413                            | 45197                            | 45298                           |
| PARNA68                                                             | <i>S. apella</i>    | 8641                              | 13292                             | 15321                             | 16527                            | 17006                            | 17397                            | 17504                           |

Table S3 continued

|         |                       |       |       |       |       |       |       |       |
|---------|-----------------------|-------|-------|-------|-------|-------|-------|-------|
| RBG16   | <i>S. apella</i>      | 13377 | 19625 | 22245 | 24167 | 24714 | 25054 | 25104 |
| RETA01  | <i>S. apella</i>      | 16871 | 31125 | 43074 | 58217 | 67410 | 74811 | 75849 |
| RETA06  | <i>S. apella</i>      | 13137 | 21690 | 26159 | 28675 | 29346 | 29913 | 30057 |
| RETA2   | <i>S. apella</i>      | 16312 | 28287 | 35196 | 38828 | 39499 | 39903 | 39946 |
| RVR19   | <i>S. apella</i>      | 16851 | 30928 | 41936 | 51232 | 53432 | 54799 | 55068 |
| RVR20   | <i>S. apella</i>      | 16842 | 30693 | 40519 | 47433 | 49725 | 51585 | 51855 |
| RVR21   | <i>S. apella</i>      | 16816 | 30309 | 38814 | 44273 | 47029 | 49501 | 49868 |
| RVR66   | <i>S. apella</i>      | 16863 | 31026 | 42016 | 51527 | 55773 | 59183 | 59528 |
| RVR69   | <i>S. apella</i>      | 16716 | 30002 | 39473 | 47604 | 52056 | 56440 | 57180 |
| UNIR307 | <i>S. apella</i>      | 11186 | 18033 | 21519 | 23813 | 24713 | 25431 | 25606 |
| UNIR324 | <i>S. apella</i>      | 16787 | 30290 | 39910 | 50439 | 56958 | 62639 | 63862 |
| UNIR349 | <i>S. apella</i>      | 16872 | 31063 | 42467 | 53239 | 56344 | 58189 | 58579 |
| UNIR351 | <i>S. apella</i>      | 16855 | 30923 | 41783 | 51342 | 53751 | 55115 | 55475 |
| UNIR359 | <i>S. apella</i>      | 16850 | 30839 | 41193 | 49413 | 52423 | 54632 | 54896 |
| UNIR395 | <i>S. apella</i>      | 11341 | 16652 | 18639 | 19552 | 19746 | 19845 | 19865 |
| UNIR412 | <i>S. apella</i>      | 16805 | 30699 | 41273 | 52608 | 61076 | 70354 | 72300 |
| UNIR429 | <i>S. apella</i>      | 7027  | 9373  | 10171 | 10714 | 10836 | 10906 | 10924 |
| UNIR569 | <i>S. apella</i>      | 16867 | 31138 | 43321 | 59838 | 70479 | 79949 | 81891 |
| MSF     | <i>S. cay</i>         | 16666 | 29375 | 36629 | 40695 | 41571 | 42083 | 42162 |
| W70     | <i>S. cay</i>         | 16859 | 31125 | 43329 | 60943 | 72991 | 83265 | 85253 |
| W72     | <i>S. cay</i>         | 16868 | 31142 | 43393 | 61437 | 76734 | 92726 | 95996 |
| CPB1    | <i>S. flavius</i>     | 7713  | 12666 | 15572 | 17897 | 18959 | 19779 | 19924 |
| CPB196  | <i>S. flavius</i>     | 16647 | 28895 | 35530 | 39542 | 40572 | 41186 | 41258 |
| CPB2    | <i>S. flavius</i>     | 16867 | 30999 | 42547 | 55718 | 61571 | 66537 | 67239 |
| CPB429  | <i>S. flavius</i>     | 16860 | 31034 | 42355 | 54502 | 63241 | 72109 | 73545 |
| CPB462  | <i>S. flavius</i>     | 16865 | 31094 | 42680 | 55213 | 65612 | 76433 | 77939 |
| CPB463  | <i>S. flavius</i>     | 16805 | 30639 | 41252 | 51788 | 58403 | 64745 | 65447 |
| CPB502  | <i>S. flavius</i>     | 16851 | 30972 | 42315 | 54728 | 62585 | 69725 | 70569 |
| CPB517  | <i>S. flavius</i>     | 16796 | 30567 | 40763 | 49397 | 52701 | 55342 | 55600 |
| CPB527  | <i>S. flavius</i>     | 16852 | 31026 | 42604 | 54692 | 60996 | 66517 | 67126 |
| CPB536  | <i>S. flavius</i>     | 16793 | 30238 | 39695 | 48203 | 53853 | 59692 | 60865 |
| CPB559  | <i>S. flavius</i>     | 16639 | 28979 | 35864 | 40700 | 42593 | 43930 | 44108 |
| CPB570  | <i>S. flavius</i>     | 16874 | 31152 | 43387 | 60839 | 74317 | 86513 | 88428 |
| CPB580  | <i>S. flavius</i>     | 16871 | 31136 | 43368 | 60500 | 71850 | 83091 | 85464 |
| CPB589  | <i>S. flavius</i>     | 16856 | 31044 | 42638 | 55079 | 63672 | 72452 | 73813 |
| CPB593  | <i>S. flavius</i>     | 16868 | 31124 | 43280 | 60144 | 71349 | 81659 | 83838 |
| CPB598  | <i>S. flavius</i>     | 16666 | 28974 | 35891 | 40253 | 41622 | 42538 | 42682 |
| CPB601  | <i>S. flavius</i>     | 15392 | 24218 | 28475 | 31462 | 32467 | 33049 | 33111 |
| CPB608  | <i>S. flavius</i>     | 16868 | 31110 | 43156 | 58352 | 72491 | 90350 | 93380 |
| CPB613  | <i>S. flavius</i>     | 16865 | 31132 | 43274 | 58924 | 72718 | 90883 | 94154 |
| CPB615  | <i>S. flavius</i>     | 16861 | 31100 | 42985 | 57383 | 68344 | 79961 | 81727 |
| CPB616  | <i>S. flavius</i>     | 11249 | 16377 | 18326 | 19297 | 19569 | 19789 | 19822 |
| CPB617  | <i>S. flavius</i>     | 16851 | 30714 | 40499 | 49093 | 53198 | 56254 | 56716 |
| CPB618  | <i>S. flavius</i>     | 16858 | 30766 | 40796 | 49320 | 53316 | 56016 | 56302 |
| CPB112  | <i>S. libidinosus</i> | 12598 | 20001 | 24456 | 29687 | 32933 | 36474 | 38854 |
| CPB237  | <i>S. libidinosus</i> | 16865 | 31112 | 43161 | 58521 | 72267 | 88918 | 91878 |
| CPB238  | <i>S. libidinosus</i> | 16860 | 31103 | 43147 | 58606 | 71249 | 85762 | 88352 |
| CPB239  | <i>S. libidinosus</i> | 16861 | 31019 | 42574 | 55397 | 63831 | 72584 | 73842 |
| CPB240  | <i>S. libidinosus</i> | 16843 | 30949 | 41992 | 52623 | 58950 | 64651 | 65297 |
| CPB241  | <i>S. libidinosus</i> | 16852 | 30988 | 41991 | 52328 | 57607 | 62197 | 62820 |
| CPB379  | <i>S. libidinosus</i> | 16861 | 31055 | 42633 | 55080 | 61848 | 67379 | 68009 |
| CPB382  | <i>S. libidinosus</i> | 16832 | 30685 | 40505 | 48041 | 51137 | 53793 | 54102 |
| CPB447  | <i>S. libidinosus</i> | 16857 | 31076 | 42974 | 57909 | 70318 | 84443 | 87249 |

Table S3 continued

|         |                         |       |       |       |       |       |        |        |
|---------|-------------------------|-------|-------|-------|-------|-------|--------|--------|
| CPB456  | <i>S. libidinosus</i>   | 16836 | 30625 | 40658 | 48820 | 52301 | 54939  | 55239  |
| CPB457  | <i>S. libidinosus</i>   | 16317 | 28380 | 36072 | 42663 | 45993 | 48581  | 48920  |
| CPB458  | <i>S. libidinosus</i>   | 16666 | 29011 | 35992 | 40835 | 42796 | 44264  | 44456  |
| CPB619  | <i>S. libidinosus</i>   | 14491 | 23366 | 27737 | 30903 | 32342 | 33436  | 33701  |
| CPB620  | <i>S. libidinosus</i>   | 16871 | 31134 | 43270 | 59209 | 73863 | 91056  | 93927  |
| CPB621  | <i>S. libidinosus</i>   | 16860 | 31033 | 42143 | 53094 | 63294 | 75178  | 77011  |
| DT01    | <i>S. libidinosus</i>   | 16726 | 30113 | 39657 | 48164 | 53415 | 58863  | 59895  |
| DT03    | <i>S. libidinosus</i>   | 16854 | 31074 | 43241 | 60564 | 74133 | 88990  | 92032  |
| DT05    | <i>S. libidinosus</i>   | 16672 | 29870 | 39138 | 47480 | 52622 | 58072  | 58941  |
| DT06    | <i>S. libidinosus</i>   | 16855 | 31067 | 43192 | 61035 | 80445 | 108967 | 116444 |
| DT8     | <i>S. libidinosus</i>   | 16851 | 30971 | 42163 | 53883 | 60853 | 67296  | 68175  |
| LIB01   | <i>S. libidinosus</i>   | 13426 | 20947 | 23991 | 25291 | 25578 | 25776  | 25813  |
| MN36336 | <i>S. libidinosus</i>   | 8282  | 13102 | 15595 | 17321 | 18089 | 18727  | 18919  |
| MN37431 | <i>S. libidinosus</i>   | 16846 | 30808 | 41162 | 49622 | 53327 | 56356  | 56754  |
| UFG1    | <i>S. libidinosus</i>   | 16864 | 31070 | 42885 | 58005 | 66452 | 73286  | 74277  |
| UFG2    | <i>S. libidinosus</i>   | 15949 | 25943 | 31024 | 34714 | 35819 | 36457  | 36563  |
| AAM3    | <i>S. macrocephalus</i> | 4864  | 7528  | 8821  | 9846  | 10231 | 10435  | 10481  |
| CTG118  | <i>S. macrocephalus</i> | 16737 | 30272 | 40018 | 48775 | 53562 | 58226  | 59101  |
| CTG160  | <i>S. macrocephalus</i> | 16862 | 31007 | 42122 | 51042 | 52818 | 53832  | 54011  |
| CTG173  | <i>S. macrocephalus</i> | 16872 | 31035 | 42013 | 51615 | 56577 | 61683  | 62566  |
| CTG183  | <i>S. macrocephalus</i> | 16162 | 26702 | 32681 | 38678 | 42073 | 45192  | 46544  |
| CTG5673 | <i>S. macrocephalus</i> | 16856 | 30898 | 41992 | 54352 | 63634 | 73555  | 75845  |
| CTG5675 | <i>S. macrocephalus</i> | 16669 | 29841 | 38839 | 46264 | 50531 | 54949  | 55801  |
| CTG713  | <i>S. macrocephalus</i> | 16866 | 31124 | 43204 | 58647 | 67133 | 73714  | 74785  |
| CTG715  | <i>S. macrocephalus</i> | 16867 | 31105 | 42874 | 57578 | 65731 | 72448  | 74896  |
| FR115   | <i>S. macrocephalus</i> | 14574 | 22228 | 25750 | 28167 | 28807 | 29145  | 29201  |
| JPB80   | <i>S. macrocephalus</i> | 11058 | 15543 | 17052 | 17871 | 18157 | 18369  | 18399  |
| LB1253  | <i>S. macrocephalus</i> | 16833 | 30565 | 40528 | 50001 | 55151 | 59977  | 60737  |
| LB1265  | <i>S. macrocephalus</i> | 14446 | 22387 | 25601 | 27182 | 27572 | 27808  | 27846  |
| LB1295  | <i>S. macrocephalus</i> | 16874 | 31145 | 43128 | 57495 | 67987 | 78864  | 80394  |
| LB1298  | <i>S. macrocephalus</i> | 16310 | 27277 | 33507 | 39120 | 41524 | 43208  | 43552  |
| LB138   | <i>S. macrocephalus</i> | 16771 | 29619 | 37723 | 45131 | 48577 | 51120  | 51603  |
| LB139   | <i>S. macrocephalus</i> | 16783 | 30293 | 39686 | 46719 | 49277 | 51528  | 51841  |
| LB712   | <i>S. macrocephalus</i> | 16808 | 30145 | 39438 | 49242 | 55675 | 61022  | 62157  |
| LB740   | <i>S. macrocephalus</i> | 16872 | 31149 | 43244 | 59719 | 73346 | 89158  | 92191  |
| LB743   | <i>S. macrocephalus</i> | 16870 | 31102 | 42953 | 56678 | 62526 | 67025  | 67695  |
| LB751   | <i>S. macrocephalus</i> | 12334 | 20175 | 24319 | 26932 | 27967 | 28888  | 29078  |
| LB767   | <i>S. macrocephalus</i> | 16870 | 31139 | 43284 | 61481 | 83082 | 122324 | 141689 |
| LB768   | <i>S. macrocephalus</i> | 16873 | 31120 | 42937 | 55829 | 62090 | 66359  | 66819  |
| LB779   | <i>S. macrocephalus</i> | 16865 | 31109 | 43140 | 59316 | 71092 | 83848  | 86501  |
| LB780   | <i>S. macrocephalus</i> | 15552 | 25069 | 29523 | 32247 | 33220 | 33827  | 33899  |
| SGC     | <i>S. macrocephalus</i> | 16090 | 26444 | 31756 | 35235 | 36233 | 36771  | 36835  |
| W112    | <i>S. nigrinus</i>      | 16713 | 30732 | 42570 | 60080 | 74680 | 90002  | 94320  |
| W25     | <i>S. nigrinus</i>      | 8175  | 12437 | 15068 | 18516 | 21185 | 23936  | 25939  |
| W59     | <i>S. nigrinus</i>      | 4971  | 6865  | 7625  | 8262  | 8669  | 9062   | 9249   |
| CP2110  | <i>S. robustus</i>      | 16753 | 30369 | 40200 | 49700 | 54419 | 58463  | 59534  |
| CPB165  | <i>S. robustus</i>      | 16781 | 30530 | 40400 | 48569 | 52441 | 55703  | 56543  |
| CPB167  | <i>S. robustus</i>      | 16639 | 29743 | 38378 | 44404 | 46389 | 48241  | 48872  |
| CPB169  | <i>S. robustus</i>      | 16775 | 30723 | 41497 | 52095 | 57690 | 62535  | 63585  |
| CP1624  | <i>S. xanthosternos</i> | 16781 | 30807 | 42340 | 56784 | 69696 | 85748  | 89134  |
| CP2006  | <i>S. xanthosternos</i> | 16768 | 30821 | 42562 | 57594 | 72451 | 93764  | 98416  |
| CPB102  | <i>S. xanthosternos</i> | 13325 | 20502 | 24213 | 27896 | 29799 | 31584  | 32459  |
| CPB103  | <i>S. xanthosternos</i> | 16681 | 30337 | 40287 | 48413 | 52258 | 55665  | 56827  |

Table S3 continued

|        |                         |       |       |       |       |       |       |       |
|--------|-------------------------|-------|-------|-------|-------|-------|-------|-------|
| CPB104 | <i>S. xanthosternos</i> | 16708 | 30462 | 41143 | 53394 | 62108 | 70868 | 73149 |
| CPB105 | <i>S. xanthosternos</i> | 16556 | 29162 | 37291 | 44784 | 49140 | 52877 | 54054 |
| CPB107 | <i>S. xanthosternos</i> | 16688 | 30424 | 40936 | 51788 | 59372 | 66658 | 68584 |
| CPB108 | <i>S. xanthosternos</i> | 16702 | 30577 | 41925 | 54871 | 66116 | 78550 | 81633 |
| CPB164 | <i>S. xanthosternos</i> | 6725  | 10486 | 12843 | 15967 | 18752 | 22255 | 25100 |
| CPB174 | <i>S. xanthosternos</i> | 16715 | 30551 | 41195 | 51163 | 56436 | 61269 | 62444 |
| SG6118 | <i>Saimiri</i>          | 9018  | 14751 | 19079 | 24443 | 28981 | 34591 | 51694 |
| SP3654 | <i>Saimiri</i>          | 9160  | 15091 | 19763 | 25998 | 31785 | 38994 | 56894 |
| SP4308 | <i>Saimiri</i>          | 8859  | 14389 | 18418 | 22844 | 26187 | 30751 | 47471 |
| CPB530 | <i>Sapajus sp.</i>      | 16863 | 30878 | 41442 | 50965 | 55234 | 58285 | 58665 |
| CPB531 | <i>Sapajus sp.</i>      | 16828 | 30696 | 41165 | 50696 | 55655 | 60002 | 60536 |
| CPB532 | <i>Sapajus sp.</i>      | 10657 | 15934 | 18229 | 19385 | 19699 | 19941 | 19973 |
| CPB533 | <i>Sapajus sp.</i>      | 16841 | 30850 | 41565 | 51906 | 56955 | 60790 | 61200 |
| CPB534 | <i>Sapajus sp.</i>      | 16776 | 30063 | 38954 | 45656 | 48355 | 50223 | 50417 |
| CPB538 | <i>Sapajus sp.</i>      | 16787 | 29793 | 38380 | 47054 | 52546 | 57240 | 58027 |
| CPB542 | <i>Sapajus sp.</i>      | 16703 | 29639 | 38013 | 43590 | 45371 | 46626 | 46747 |
| CPB543 | <i>Sapajus sp.</i>      | 16856 | 30771 | 40990 | 49378 | 52906 | 55288 | 55517 |
| CPB544 | <i>Sapajus sp.</i>      | 16798 | 30219 | 38880 | 45826 | 49356 | 52331 | 52723 |
| CPB545 | <i>Sapajus sp.</i>      | 16875 | 31131 | 42949 | 56055 | 63107 | 68600 | 69243 |

<sup>1</sup>Minimum number of samples a locus must be present in to be included in the final genotype matrix, represented as a percentage of the total number of samples.
