# Supplementary material for: A New Assessment of Robust Capuchin Monkey (Sapajus) Evolutionary History Using Genome-Wide SNP Marker Data and a Bayesian Approach to Species Delimitation
Source: MDPI journal article supplement (doi:10.3390/genes14050970), 2023-04-25
Supplement: s1 [file s1]

**Table S1** - Morphology-based and phylogenetic taxonomies of robust capuchin monkeys.

| Elliot (1913)<br>[8]                 | Herskovitz<br>(1949) <sup>1</sup> [9] | Cabrera (1957)<br>[10]                     | Hill (1960) [1]                            | Groves (2001,<br>2005) [11,12]             | Silva-Júnior<br>(2001) [3]                     | Rylands et al.<br>(2013) [7]                                                | Lima et al.<br>2017 <sup>2</sup> [5]   | Lima et al. 2018 <sup>3</sup><br>[13]  |
|--------------------------------------|---------------------------------------|--------------------------------------------|--------------------------------------------|--------------------------------------------|------------------------------------------------|-----------------------------------------------------------------------------|----------------------------------------|----------------------------------------|
| <i>Cebus apella</i>                  | <i>Cebus apella</i>                   | <i>Cebus apella</i><br><i>C. a. apella</i> | <i>Cebus apella</i><br><i>C. a. apella</i> | <i>Cebus apella</i><br><i>C. a. apella</i> | <i>Cebus (Sapajus)</i><br><i>apella</i>        | <i>Sapajus apella</i>                                                       | <i>Sapajus apella</i>                  | <i>Sapajus apella</i>                  |
| <i>Cebus fatuellus</i>               |                                       | <i>C. a. margaritae</i>                    | <i>C. a. margaritae</i>                    | <i>C. a. fatuellus</i>                     |                                                |                                                                             | <i>Sapajus</i><br><i>xanthosternos</i> | <i>Sapajus</i><br><i>libidinosus</i>   |
| <i>C. f. fatuellus</i>               |                                       | <i>C. a. macrocephalus</i>                 | <i>C. a. fatuellus</i>                     | <i>C. a. margaritae</i>                    |                                                | <i>Sapajus</i><br><i>macrocephalus</i>                                      |                                        |                                        |
| <i>C. f. peruanus</i>                |                                       | <i>C. a. libidinosus</i>                   | <i>C. a. peruanus</i>                      | <i>C. a.</i>                               | <i>Cebus (Sapajus)</i><br><i>macrocephalus</i> |                                                                             | <i>Sapajus</i><br><i>robustus</i>      | <i>Sapajus flavius</i>                 |
| <i>Cebus</i><br><i>macrocephalus</i> |                                       | <i>C. a. paraguayanus</i>                  | <i>C. a. tocaninus</i>                     | <i>macrocephalus</i>                       |                                                |                                                                             |                                        |                                        |
|                                      |                                       | <i>C. a. pallidus</i>                      | <i>C. a.</i>                               | <i>C. a. peruanus</i>                      |                                                | <i>Sapajus cay</i>                                                          |                                        |                                        |
|                                      |                                       | <i>C. a. xanthosternos</i>                 | <i>macrocephalus</i>                       | <i>C. a. tocaninus</i>                     | <i>Cebus (Sapajus)</i><br><i>libidinosus</i>   |                                                                             | <i>Sapajus nigrinus</i>                | <i>Sapajus</i><br><i>xanthosternos</i> |
| <i>Cebus</i><br><i>libidinosus</i>   |                                       | <i>C. a. versutus</i>                      | <i>C. a. libidinosus</i>                   | <i>Cebus libidinosus</i>                   |                                                | <i>Sapajus libidinosus</i>                                                  |                                        | <i>Sapajus robustus</i>                |
|                                      |                                       | <i>C. a. nigrinus</i>                      | <i>C. a. cay</i>                           | <i>C. l. libidinosus</i>                   |                                                |                                                                             |                                        |                                        |
|                                      |                                       | <i>C. a. vellerosus</i>                    | <i>C. a. pallidus</i>                      | <i>C. l. pallidus</i>                      | <i>Cebus (Sapajus) cay</i>                     | <i>Sapajus nigrinus</i><br><i>S. n. nigrinus</i><br><i>S. n. cucullatus</i> |                                        | <i>Sapajus nigrinus</i>                |
| <i>Cebus azarae</i>                  |                                       | <i>C. a. robustus</i>                      | <i>C. a. frontatus</i>                     | <i>C. l.</i>                               |                                                |                                                                             |                                        |                                        |
| <i>C. a. azarae</i>                  |                                       |                                            | <i>xanthosternos</i>                       | <i>paraguayanus</i>                        | <i>Cebus (Sapajus)</i><br><i>nigrinus</i>      |                                                                             |                                        |                                        |
| <i>C. a. pallidus</i>                |                                       |                                            | <i>C. a. nigrinus</i>                      | <i>C. l. juruanus</i>                      |                                                |                                                                             |                                        |                                        |
| <i>Cebus</i><br><i>frontatus</i>     |                                       |                                            | <i>C. a. robustus</i>                      |                                            |                                                | <i>Sapajus robustus</i>                                                     |                                        |                                        |
|                                      |                                       |                                            | <i>C. a. magnus</i>                        | <i>Cebus nigrinus</i>                      |                                                |                                                                             |                                        |                                        |
|                                      |                                       |                                            | <i>C. a. juruanus</i>                      | <i>C. n. nigrinus</i>                      | <i>Cebus (Sapajus)</i><br><i>robustus</i>      |                                                                             | <i>Sapajus</i><br><i>xanthosternos</i> |                                        |
| <i>Cebus</i><br><i>variegatus</i>    |                                       |                                            | <i>C. a. maranonis</i>                     | <i>C. n. robustus</i>                      | <i>Cebus (Sapajus)</i><br><i>xanthosternos</i> |                                                                             |                                        |                                        |
|                                      |                                       |                                            |                                            | <i>C. n. cucullatus</i>                    |                                                |                                                                             |                                        |                                        |
| <i>Cebus versuta</i>                 |                                       |                                            |                                            | <i>Cebus</i><br><i>xanthosternos</i>       |                                                |                                                                             |                                        |                                        |
| <i>Cebus cirrifer</i>                |                                       |                                            |                                            |                                            |                                                | <i>Sapajus flavius</i>                                                      |                                        |                                        |
| <i>Cebus</i><br><i>crassiceps</i>    |                                       |                                            |                                            |                                            |                                                |                                                                             |                                        |                                        |
| <i>Cebus</i><br><i>caliginosus</i>   |                                       |                                            |                                            |                                            |                                                |                                                                             |                                        |                                        |
| <i>Cebus</i><br><i>velerosus</i>     |                                       |                                            |                                            |                                            |                                                |                                                                             |                                        |                                        |

<sup>1</sup>Referent to the model hypothesis H0 in the Bayes factor species delimitation approach (Figure 3).

<sup>2</sup>Referent to the model hypothesis H1 in the Bayes factor species delimitation approach (Figure 3).

<sup>3</sup>Referent to the model hypothesis H2 in the Bayes factor species delimitation approach (Figure 3).
