# Supplementary material for: A New Assessment of Robust Capuchin Monkey (Sapajus) Evolutionary History Using Genome-Wide SNP Marker Data and a Bayesian Approach to Species Delimitation
Source: MDPI journal article supplement (doi:10.3390/genes14050970), 2023-04-25
Supplement: s1 [file s1]

**Table S2** - Samples used in the study. UT Austin: University of Texas at Austin; CPB/ICMBio: Centro Nacional de Pesquisa e Conservação de Primatas Brasileiros; UEL: Laboratório de Zoonoses e Saúde Pública do Departamento de Medicina Veterinária Preventiva da Universidade Estadual de Londrina; \*samples from captivity / unknown exact locality

| Number in the map | Species                | Sample code | Latitude     | Longitude    | Sample Type | Source                |
|-------------------|------------------------|-------------|--------------|--------------|-------------|-----------------------|
| 1                 | <i>Cebus albifrons</i> | IPB994      | -1.05        | -62.89       | Tissue      | [5]                   |
| 2                 | <i>Cebus albifrons</i> | RETA10      | -3.138056    | -55.509722   | Tissue      | M.G.M.L.; unpublished |
| 3                 | <i>Cebus albifrons</i> | RETA9       | -3.138056    | -55.509722   | Tissue      | [5]                   |
| 4                 | <i>Cebus albifrons</i> | FR85        | -6.570031    | -64.369217   | Tissue      | [13]                  |
| 5                 | <i>Cebus albifrons</i> | LB1272      | -4.935556    | -68.17333333 | Tissue      | [57]                  |
| 6                 | <i>Cebus albifrons</i> | LB1285      | -4.935556    | -68.17333333 | Tissue      | [57]                  |
| 7                 | <i>Cebus albifrons</i> | LB1293      | -4.935556    | -68.17333333 | Tissue      | [57]                  |
| 8                 | <i>Cebus albifrons</i> | LB1297      | -4.935556    | -68.17333333 | Tissue      | [5]                   |
| 9                 | <i>Cebus albifrons</i> | LB736       | -2.47        | -64.83       | Tissue      | [5]                   |
| 10                | <i>Cebus albifrons</i> | LB772       | -2.590944    | -64.88627778 | Tissue      | [13]                  |
| 11                | <i>Cebus albifrons</i> | LB858       | -4.662722    | -56.552722   | Tissue      | [5]                   |
| 12                | <i>Cebus kaapori</i>   | CPB414      | *            | *            | Blood       | CPB/ICMBio            |
| 13                | <i>Cebus kaapori</i>   | CPB443      | *            | *            | Blood       | CPB/ICMBio            |
| 14                | <i>Cebus olivaceus</i> | AP116       | -0.582778    | -52.332778   | Tissue      | [57]                  |
| 15                | <i>Cebus olivaceus</i> | AP117       | -0.582778    | -52.332778   | Tissue      | [13]                  |
| 16                | <i>Cebus olivaceus</i> | AP178       | -3.22        | -52.03       | Tissue      | [5]                   |
| 17                | <i>Cebus olivaceus</i> | AP241       | -3.85        | -52.76       | Tissue      | [13]                  |
| 18                | <i>Cebus olivaceus</i> | AP242       | -3.85        | -52.76       | Tissue      | [57]                  |
| 19                | <i>Cebus olivaceus</i> | CPB479      | *            | *            | Blood       | CPB/ICMBio            |
| 20                | <i>Saimiri</i>         | SG6118      | *            | *            | Tissue      | UT Austin             |
| 21                | <i>Saimiri</i>         | SP3654      | *            | *            | Tissue      | UT Austin             |
| 22                | <i>Saimiri</i>         | SP4308      | *            | *            | Tissue      | UT Austin             |
| 23                | <i>Sapajus apella</i>  | AP110       | -0.30777778  | -52.45138889 | Tissue      | [5]                   |
| 24                | <i>Sapajus apella</i>  | AP133       | -0.58277778  | -52.33277778 | Tissue      | [13]                  |
| 25                | <i>Sapajus apella</i>  | AP146       | 3.22027778   | -52.02777778 | Tissue      | [13]                  |
| 26                | <i>Sapajus apella</i>  | AP162       | 3.22027778   | -52.02777778 | Tissue      | M.G.M.L.; unpublished |
| 27                | <i>Sapajus apella</i>  | AP225       | 3.85388889   | -52.75777778 | Tissue      | M.G.M.L.; unpublished |
| 28                | <i>Sapajus apella</i>  | AP226       | 3.85388889   | -52.75777778 | Tissue      | M.G.M.L.; unpublished |
| 29                | <i>Sapajus apella</i>  | CA2403      | -8.89        | -63.24       | Tissue      | [13]                  |
| 30                | <i>Sapajus apella</i>  | CN138       | -0.962769444 | -55.52224444 | Tissue      | [5]                   |
| 31                | <i>Sapajus apella</i>  | CN150       | -0.165488889 | -55.1864     | Tissue      | [5]                   |
| 32                | <i>Sapajus apella</i>  | CN153       | -0.165488889 | -55.1864     | Tissue      | [5]                   |
| 33                | <i>Sapajus apella</i>  | CN217       | 1.285419444  | -58.6959     | Tissue      | [13]                  |
| 34                | <i>Sapajus apella</i>  | CN235       | 0.828619444  | -53.9312     | Tissue      | M.G.M.L.; unpublished |
| 35                | <i>Sapajus apella</i>  | CN236       | -0.83        | -53.93       | Tissue      | M.G.M.L.; unpublished |
| 36                | <i>Sapajus apella</i>  | CN249       | -0.943969444 | -53.2363     | Tissue      | M.G.M.L.; unpublished |

|    |                                          |         |              |              |        |                          |
|----|------------------------------------------|---------|--------------|--------------|--------|--------------------------|
| 37 | <i>Sapajus apella</i>                    | CN250   | -0.943969444 | -53.2363     | Tissue | [5]                      |
| 38 | <i>Sapajus apella</i>                    | CN292   | 0.630280556  | -55.7285     | Tissue | [5]                      |
| 39 | <i>Sapajus apella</i>                    | CN293   | 0.630280556  | -55.7285     | Tissue | M.G.M.L.;<br>unpublished |
| 40 | <i>Sapajus apella</i>                    | CTG19   | -2.060694444 | -58.38461111 | Tissue | M.G.M.L.;<br>unpublished |
| 41 | <i>Sapajus apella</i>                    | CTG30   | -1.88        | -58.23       | Tissue | M.G.M.L.;<br>unpublished |
| 42 | <i>Sapajus apella</i>                    | FES08   | -7.613129    | -60.792217   | Tissue | [5]                      |
| 43 | <i>Sapajus apella</i>                    | JIR4590 | -12.45298333 | -62.92267222 | Tissue | [13]                     |
| 44 | <i>Sapajus apella</i>                    | LB807   | -2.483333333 | -55.96666667 | Tissue | M.G.M.L.;<br>unpublished |
| 45 | <i>Sapajus apella</i>                    | LB808   | -2.6         | -56.18333333 | Tissue | [13]                     |
| 46 | <i>Sapajus apella</i>                    | LB859   | -4.662722222 | -56.55272222 | Tissue | M.G.M.L.;<br>unpublished |
| 47 | <i>Sapajus apella</i>                    | LB860   | -4.662722222 | -56.55272222 | Tissue | M.G.M.L.;<br>unpublished |
| 48 | <i>Sapajus apella</i>                    | MCB42   | -3.36        | -51.74       | Tissue | [13]                     |
| 49 | <i>Sapajus apella</i>                    | PARNA68 | -3.884916667 | -56.77793333 | Tissue | [13]                     |
| 50 | <i>Sapajus apella</i>                    | RBG16   | -12.56244444 | -63.4415     | Tissue | [13]                     |
| 51 | <i>Sapajus apella</i>                    | RETA01  | -3.180077778 | -55.80346944 | Tissue | [13]                     |
| 52 | <i>Sapajus apella</i>                    | RETA06  | -3.1175      | -55.51583333 | Tissue | M.G.M.L.;<br>unpublished |
| 53 | <i>Sapajus apella</i>                    | RETA2   | -2.801111111 | -55.57527778 | Tissue | M.G.M.L.;<br>unpublished |
| 54 | <i>Sapajus apella</i>                    | RVR19   | -10.00358333 | -56.04788889 | Tissue | [5]                      |
| 55 | <i>Sapajus apella</i>                    | RVR20   | -10.00169444 | -56.04227778 | Tissue | [5]                      |
| 56 | <i>Sapajus apella</i>                    | RVR21   | -10.00169444 | -56.04227778 | Tissue | [13]                     |
| 57 | <i>Sapajus apella</i>                    | RVR66   | -9.60425     | -56.016      | Tissue | [5]                      |
| 58 | <i>Sapajus apella</i>                    | RVR69   | -9.603944444 | -56.01497222 | Tissue | [5]                      |
| 59 | <i>Sapajus apella</i>                    | UNIR307 | -8.801109167 | -63.94994278 | Tissue | [13]                     |
| 60 | <i>Sapajus apella</i>                    | UNIR324 | -9.102089722 | -62.88418611 | Tissue | [13]                     |
| 61 | <i>Sapajus apella</i>                    | UNIR349 | -12.00090528 | -60.68609278 | Tissue | M.G.M.L.;<br>unpublished |
| 62 | <i>Sapajus apella</i>                    | UNIR351 | -11.95273917 | -60.68598889 | Tissue | [5]                      |
| 63 | <i>Sapajus apella</i>                    | UNIR359 | -12.033825   | -60.66866222 | Tissue | [13]                     |
| 64 | <i>Sapajus apella</i>                    | UNIR395 | -8.781854167 | -63.7023625  | Tissue | M.G.M.L.;<br>unpublished |
| 65 | <i>Sapajus apella</i>                    | UNIR412 | -8.670666667 | -62.36875139 | Tissue | [13]                     |
| 66 | <i>Sapajus apella</i>                    | UNIR429 | -8.191056667 | -64.01619694 | Tissue | [13]                     |
| 67 | <i>Sapajus apella</i>                    | UNIR569 | -12.50042111 | -63.53052944 | Tissue | [5]                      |
| 68 | <i>Sapajus cay</i>                       | MSF     | -16.05580833 | -57.71719167 | Tissue | [13]                     |
| 69 | <i>Sapajus cay</i>                       | W70     | -15.564685   | -55.67617    | Blood  | UEL                      |
| 70 | <i>Sapajus cay</i>                       | W72     | -15.564685   | -55.67617    | Blood  | UEL                      |
| 71 | <i>Sapajus flavius</i>                   | CPB1    | -6.57015     | -35.131517   | Blood  | CPB/ICMBio               |
| 72 | <i>Sapajus flavius</i>                   | CPB196  | -6.57015     | -35.131517   | Blood  | CPB/ICMBio               |
| 73 | <i>Sapajus flavius</i>                   | CPB2    | -6.57015     | -35.131517   | Blood  | CPB/ICMBio               |
| 74 | <i>Sapajus flavius</i>                   | CPB429  | -7.012178    | -34.956933   | Blood  | CPB/ICMBio               |
| 75 | <i>Sapajus flavius</i>                   | CPB462  | -6.57015     | -35.131517   | Blood  | CPB/ICMBio               |
| 76 | <i>Sapajus flavius</i>                   | CPB463  | -7.012178    | -34.956933   | Blood  | CPB/ICMBio               |
| 77 | <i>Sapajus flavius</i>                   | CPB502  | -7.012178    | -34.956933   | Blood  | CPB/ICMBio               |
| 78 | <i>Sapajus flavius</i>                   | CPB517  | -7.012178    | -34.956933   | Blood  | CPB/ICMBio               |
| 79 | <i>Sapajus cf. flavius</i> <sup>*1</sup> | CPB527  | -6.38901     | -35.9421     | Blood  | CPB/ICMBio               |

|     |                                           |         |              |              |        |                          |
|-----|-------------------------------------------|---------|--------------|--------------|--------|--------------------------|
| 80  | <i>Sapajus cf. flavius</i> * <sup>1</sup> | CPB536  | -9.530297    | -37.858073   | Blood  | CPB/ICMBio               |
| 81  | <i>Sapajus flavius</i>                    | CPB559  | -7.012178    | -34.956933   | Blood  | CPB/ICMBio               |
| 82  | <i>Sapajus flavius</i>                    | CPB570  | -7.01510877  | -35.09102391 | Blood  | CPB/ICMBio               |
| 83  | <i>Sapajus flavius</i>                    | CPB580  | -7.012178    | -34.956933   | Blood  | CPB/ICMBio               |
| 84  | <i>Sapajus flavius</i>                    | CPB589  | -7.476653    | -34.984681   | Blood  | CPB/ICMBio               |
| 85  | <i>Sapajus flavius</i>                    | CPB593  | -7.476653    | -34.984681   | Blood  | CPB/ICMBio               |
| 86  | <i>Sapajus flavius</i>                    | CPB598  | -7.476653    | -34.984681   | Blood  | CPB/ICMBio               |
| 87  | <i>Sapajus flavius</i>                    | CPB601  | -7.476653    | -34.984681   | Blood  | CPB/ICMBio               |
| 88  | <i>Sapajus flavius</i>                    | CPB608  | -7.476653    | -34.984681   | Blood  | CPB/ICMBio               |
| 89  | <i>Sapajus flavius</i>                    | CPB613  | -7.015639    | -35.088806   | Blood  | CPB/ICMBio               |
| 90  | <i>Sapajus flavius</i>                    | CPB615  | -7.015639    | -35.088806   | Blood  | CPB/ICMBio               |
| 91  | <i>Sapajus flavius</i>                    | CPB616  | -6.609469    | -35.135155   | Blood  | CPB/ICMBio               |
| 92  | <i>Sapajus flavius</i>                    | CPB617  | -6.609469    | -35.135155   | Blood  | CPB/ICMBio               |
| 93  | <i>Sapajus flavius</i>                    | CPB618  | -6.609469    | -35.135155   | Blood  | CPB/ICMBio               |
| 94  | <i>Sapajus libidinosus</i>                | CPB112  | -9.010022    | -42.691312   | Blood  | CPB/ICMBio               |
| 95  | <i>Sapajus libidinosus</i>                | CPB237  | -8.736013    | -42.636224   | Blood  | CPB/ICMBio               |
| 96  | <i>Sapajus libidinosus</i>                | CPB238  | -8.736013    | -42.636224   | Blood  | CPB/ICMBio               |
| 97  | <i>Sapajus libidinosus</i>                | CPB239  | -8.736013    | -42.636224   | Blood  | CPB/ICMBio               |
| 98  | <i>Sapajus libidinosus</i>                | CPB240  | -8.736013    | -42.636224   | Blood  | CPB/ICMBio               |
| 99  | <i>Sapajus libidinosus</i>                | CPB241  | -8.736013    | -42.636224   | Blood  | CPB/ICMBio               |
| 100 | <i>Sapajus libidinosus</i>                | CPB379  | -6.600234    | -38.249935   | Tissue | CPB/ICMBio               |
| 101 | <i>Sapajus libidinosus</i>                | CPB382  | -6.600234    | -38.249935   | Tissue | CPB/ICMBio               |
| 102 | <i>Sapajus libidinosus</i>                | CPB447  | -6.942634    | -38.324782   | Tissue | CPB/ICMBio               |
| 103 | <i>Sapajus libidinosus</i>                | CPB456  | -6.765285    | -38.23697    | Tissue | CPB/ICMBio               |
| 104 | <i>Sapajus libidinosus</i>                | CPB457  | -6.886193    | -38.560818   | Tissue | CPB/ICMBio               |
| 105 | <i>Sapajus libidinosus</i>                | CPB458  | -6.886193    | -38.560818   | Tissue | CPB/ICMBio               |
| 106 | <i>Sapajus libidinosus</i>                | CPB619  | -7.949199    | -38.282713   | Tissue | CPB/ICMBio               |
| 107 | <i>Sapajus libidinosus</i>                | CPB620  | -7.949199    | -38.282713   | Blood  | CPB/ICMBio               |
| 108 | <i>Sapajus libidinosus</i>                | CPB621  | -7.949199    | -38.282713   | Blood  | CPB/ICMBio               |
| 109 | <i>Sapajus libidinosus</i>                | DT01    | -2.7665      | -41.80761111 | Tissue | [5]                      |
| 110 | <i>Sapajus libidinosus</i>                | DT03    | -2.804027778 | -41.86638889 | Tissue | [5]                      |
| 111 | <i>Sapajus libidinosus</i>                | DT05    | -2.846388889 | -41.83055556 | Tissue | [5]                      |
| 112 | <i>Sapajus libidinosus</i>                | DT06    | -2.846388889 | -41.83055556 | Tissue | M.G.M.L.;<br>unpublished |
| 113 | <i>Sapajus libidinosus</i>                | DT8     | -7.929077778 | -44.19598611 | Tissue | [13]                     |
| 114 | <i>Sapajus libidinosus</i>                | LIB01   | -5.09        | -42.43       | Tissue | [5]                      |
| 115 | <i>Sapajus libidinosus</i>                | MN36336 | -14.13657222 | -48.38323889 | Tissue | [5]                      |
| 116 | <i>Sapajus libidinosus</i>                | MN37431 | -14.14       | -48.17       | Tissue | [13]                     |
| 117 | <i>Sapajus libidinosus</i>                | UFG1    | -16.60365556 | -49.26155    | Tissue | [5]                      |
| 118 | <i>Sapajus libidinosus</i>                | UFG2    | -16.60365556 | -49.26155    | Tissue | [13]                     |
| 119 | <i>Sapajus macrocephalus</i>              | AAM3    | -3.887694444 | -64.25105556 | Tissue | [5]                      |
| 120 | <i>Sapajus macrocephalus</i>              | CTG118  | -0.613388889 | -64.92069444 | Tissue | [13]                     |
| 121 | <i>Sapajus macrocephalus</i>              | CTG160  | -4.987138889 | -62.95977778 | Tissue | [13]                     |
| 122 | <i>Sapajus macrocephalus</i>              | CTG173  | -5.697       | -63.241      | Tissue | M.G.M.L.;<br>unpublished |
| 123 | <i>Sapajus macrocephalus</i>              | CTG183  | -5.694       | -63.238      | Tissue | [13]                     |
| 124 | <i>Sapajus macrocephalus</i>              | CTG5673 | -2.449527778 | -65.36355556 | Blood  | M.G.M.L.;<br>unpublished |
| 125 | <i>Sapajus macrocephalus</i>              | CTG5675 | -2.449527778 | -65.36355556 | Blood  | M.G.M.L.;<br>unpublished |
| 126 | <i>Sapajus macrocephalus</i>              | CTG713  | -1.84        | -69.03       | Tissue | M.G.M.L.;<br>unpublished |
| 127 | <i>Sapajus macrocephalus</i>              | CTG715  | -1.84        | -69.03       | Tissue | [13]                     |

|     |                                          |        |              |              |        |                          |
|-----|------------------------------------------|--------|--------------|--------------|--------|--------------------------|
| 128 | <i>Sapajus macrocephalus</i>             | FR115  | -3.37        | -60.48472222 | Tissue | [13]                     |
| 129 | <i>Sapajus macrocephalus</i>             | JPB80  | -0.478194444 | -64.41125    | Tissue | [13]                     |
| 130 | <i>Sapajus macrocephalus</i>             | LB1253 | -5.209166667 | -69.31583333 | Tissue | M.G.M.L.;<br>unpublished |
| 131 | <i>Sapajus macrocephalus</i>             | LB1265 | -5.209166667 | -69.31583333 | Tissue | [5]                      |
| 132 | <i>Sapajus macrocephalus</i>             | LB1295 | -4.935555556 | -68.17333333 | Tissue | M.G.M.L.;<br>unpublished |
| 133 | <i>Sapajus macrocephalus</i>             | LB1298 | -4.935555556 | -68.17333333 | Tissue | [13]                     |
| 134 | <i>Sapajus macrocephalus</i>             | LB138  | -4.395869444 | -70.13845278 | Tissue | [13]                     |
| 135 | <i>Sapajus macrocephalus</i>             | LB139  | -4.395869444 | -70.13845278 | Tissue | M.G.M.L.;<br>unpublished |
| 136 | <i>Sapajus macrocephalus</i>             | LB712  | -2.469722222 | -64.82583333 | Tissue | [13]                     |
| 137 | <i>Sapajus macrocephalus</i>             | LB740  | -2.590944444 | -64.88627778 | Tissue | M.G.M.L.;<br>unpublished |
| 138 | <i>Sapajus macrocephalus</i>             | LB743  | -2.590944444 | -64.88627778 | Tissue | M.G.M.L.;<br>unpublished |
| 139 | <i>Sapajus macrocephalus</i>             | LB751  | -2.590944444 | -64.88627778 | Tissue | [13]                     |
| 140 | <i>Sapajus macrocephalus</i>             | LB767  | -2.590944444 | -64.88627778 | Tissue | M.G.M.L.;<br>unpublished |
| 141 | <i>Sapajus macrocephalus</i>             | LB768  | -2.590944444 | -64.88627778 | Tissue | M.G.M.L.;<br>unpublished |
| 142 | <i>Sapajus macrocephalus</i>             | LB779  | -2.449527778 | -65.36355556 | Tissue | [5]                      |
| 143 | <i>Sapajus macrocephalus</i>             | LB780  | -2.449527778 | -65.36355556 | Tissue | [13]                     |
| 144 | <i>Sapajus macrocephalus</i>             | SGC    | -0.233333333 | -66.85       | Tissue | [13]                     |
| 145 | <i>Sapajus nigritus</i>                  | W112   | -22.833333   | -53.332778   | Blood  | UEL                      |
| 146 | <i>Sapajus nigritus</i>                  | W25    | -22.845833   | -53.304444   | Blood  | UEL                      |
| 147 | <i>Sapajus nigritus</i>                  | W59    | -22.833333   | -53.332778   | Blood  | UEL                      |
| 148 | <i>Sapajus robustus</i>                  | CP2110 | *            | *            | Blood  | [13]                     |
| 149 | <i>Sapajus robustus</i>                  | CPB165 | *            | *            | Blood  | CPB/ICMBio               |
| 150 | <i>Sapajus robustus</i>                  | CPB167 | *            | *            | Blood  | CPB/ICMBio               |
| 151 | <i>Sapajus robustus</i>                  | CPB169 | *            | *            | Blood  | CPB/ICMBio               |
| 152 | <i>Sapajus cf. flavius</i> <sup>*1</sup> | CPB530 | -9.392467    | -38.201539   | Blood  | CPB/ICMBio               |
| 153 | <i>Sapajus cf. flavius</i> <sup>*1</sup> | CPB531 | -9.392467    | -38.201539   | Blood  | CPB/ICMBio               |
| 154 | <i>Sapajus cf. flavius</i> <sup>*1</sup> | CPB532 | -9.392467    | -38.201539   | Blood  | CPB/ICMBio               |
| 155 | <i>Sapajus cf. flavius</i> <sup>*1</sup> | CPB533 | -9.392467    | -38.201539   | Blood  | CPB/ICMBio               |
| 156 | <i>Sapajus cf. flavius</i> <sup>*1</sup> | CPB534 | -9.392467    | -38.201539   | Blood  | CPB/ICMBio               |
| 157 | <i>Sapajus cf. flavius</i> <sup>*1</sup> | CPB538 | -9.657455    | -37.660893   | Blood  | CPB/ICMBio               |
| 158 | <i>Sapajus cf. flavius</i> <sup>*1</sup> | CPB542 | -9           | -37.91       | Blood  | CPB/ICMBio               |
| 159 | <i>Sapajus cf. flavius</i> <sup>*1</sup> | CPB543 | -9           | -37.91       | Blood  | CPB/ICMBio               |
| 160 | <i>Sapajus cf. flavius</i> <sup>*1</sup> | CPB544 | -9           | -37.91       | Blood  | CPB/ICMBio               |
| 161 | <i>Sapajus cf. flavius</i> <sup>*1</sup> | CPB545 | -9           | -37.91       | Blood  | CPB/ICMBio               |
| 162 | <i>Sapajus xanthosternos</i>             | CP1624 | -14.79       | -39.05       | Blood  | [13]                     |
| 163 | <i>Sapajus xanthosternos</i>             | CP2006 | -14.79       | -39.05       | Blood  | [13]                     |
| 164 | <i>Sapajus xanthosternos</i>             | CPB102 | -10.489513   | -36.442764   | Blood  | CPB/ICMBio               |
| 165 | <i>Sapajus xanthosternos</i>             | CPB103 | -10.489513   | -36.442764   | Blood  | CPB/ICMBio               |
| 166 | <i>Sapajus xanthosternos</i>             | CPB104 | -10.489513   | -36.442764   | Blood  | CPB/ICMBio               |
| 167 | <i>Sapajus xanthosternos</i>             | CPB105 | -10.489513   | -36.442764   | Blood  | CPB/ICMBio               |
| 168 | <i>Sapajus xanthosternos</i>             | CPB107 | -10.489513   | -36.442764   | Blood  | CPB/ICMBio               |
| 169 | <i>Sapajus xanthosternos</i>             | CPB108 | -10.489513   | -36.442764   | Blood  | CPB/ICMBio               |
| 170 | <i>Sapajus xanthosternos</i>             | CPB164 | *            | *            | Blood  | CPB/ICMBio               |
| 171 | <i>Sapajus xanthosternos</i>             | CPB174 | *            | *            | Blood  | CPB/ICMBio               |

\*samples from populations of capuchins occupying areas of the Atlantic Forest-Caatinga transition whose taxonomic assignment as *Sapajus flavius* is uncertain.
